# Supplementary material for: Electrocatalytic hydrogen evolution and doping modification of Weyl semimetal PtBi2 acidic solutions
Source: Royal Society of Chemistry journal article supplement (doi:10.1039/d5qi00022j), 2025-01-01
Supplement: d5qi00022j1.pdf [file d5qi00022j1.pdf]

## Electrocatalytic Hydrogen Evolution and Doping Modification of Weyl Semimetal PtBi<sub>2</sub> Acidic Solution

Yinghui Liu<sup>a</sup>, Chen Qiubo<sup>b</sup>, Yukai An<sup>c</sup>, Hailong Qiu<sup>\*a</sup>, Shihui Ma<sup>\*a</sup>, Hongjun Liu<sup>a</sup>, Zhanggui Hu<sup>a</sup> and  
Yicheng Wu<sup>a</sup>

### Supporting Information

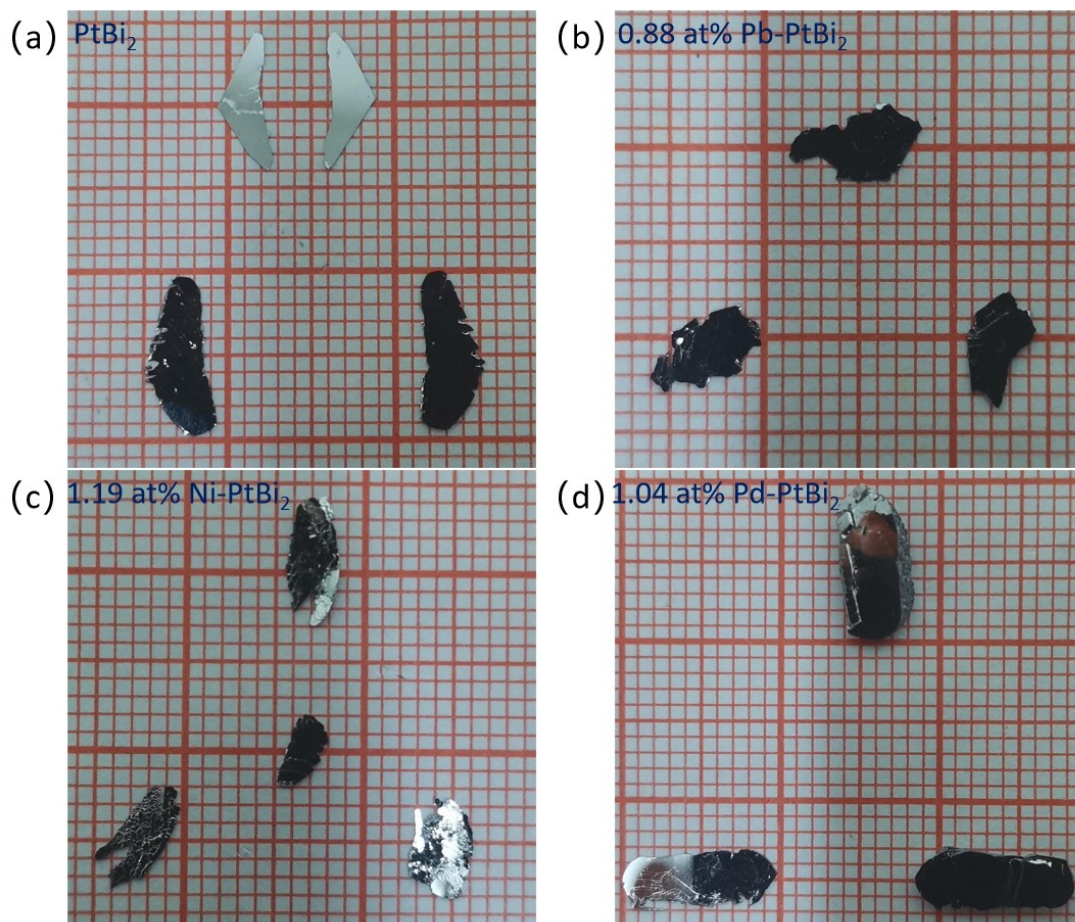

Fig. S1. Morphology and size of PtBi<sub>2</sub>, 0.88 at% Pb-PtBi<sub>2</sub>, 1.19 at% Ni-PtBi<sub>2</sub>, and 1.04 at% Pd-PtBi<sub>2</sub> crystals grown using the self flux method.

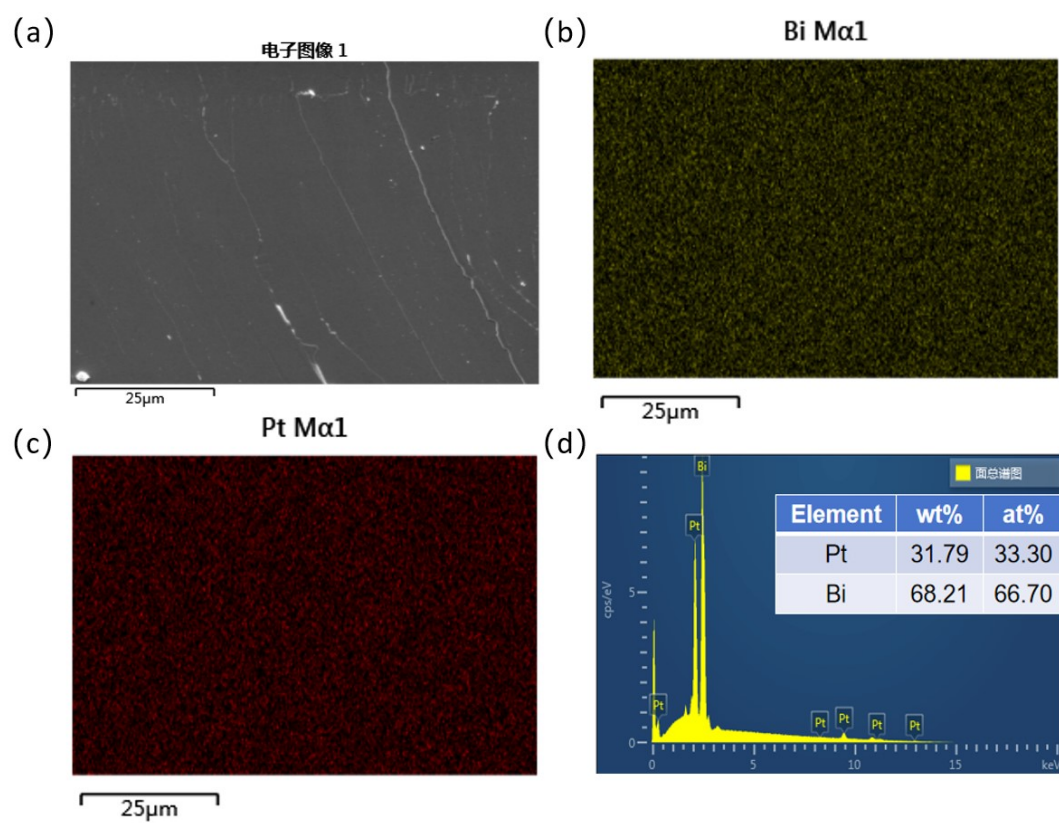

Fig. S2. SEM images of PtBi<sub>2</sub>. EDX spectra of the Pt, Bi elements, and the quantification. Elemental analysis showing the distribution of Bi and Pt elements.

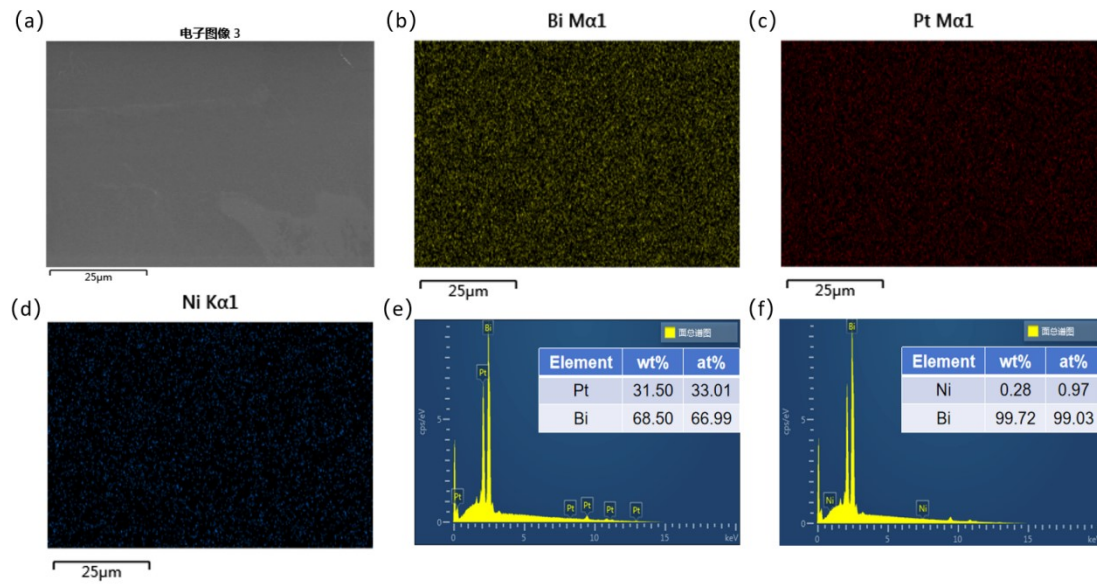

Fig. S3. SEM images of 0.65 at% Ni-PtBi<sub>2</sub>. EDX spectra of the Pt, Bi elements, and the quantification. EDX spectra of the Ni, Bi elements and the quantification. Elemental analysis showing the distribution of Bi, Pt, and Ni elements.

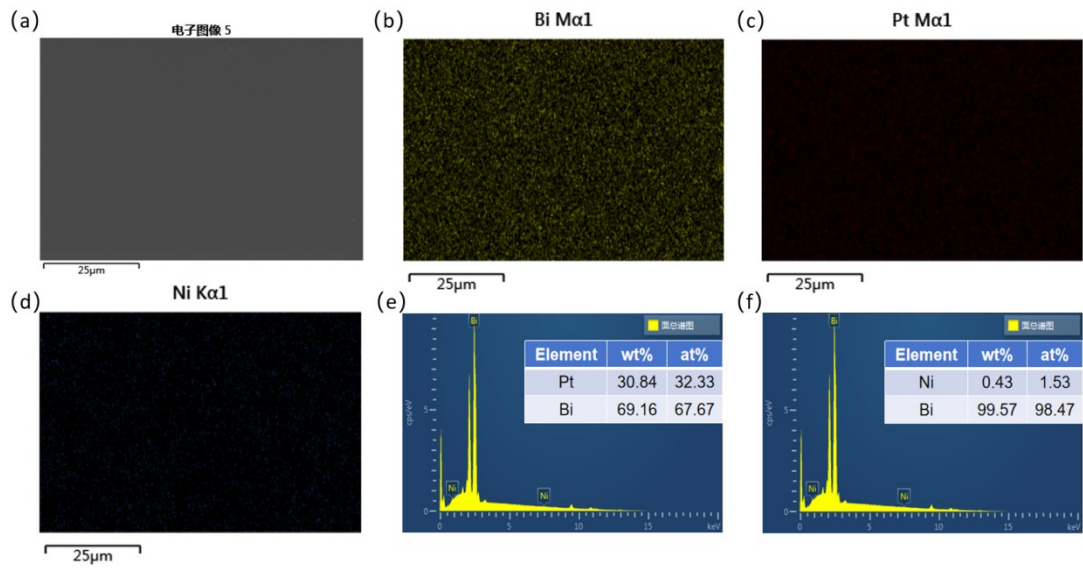

Fig. S4. SEM images of 1.04 at% Ni-PtBi<sub>2</sub>. EDX spectra of the Pt, Bi elements, and the quantification. EDX spectra of the Ni, Bi elements and the quantification. Elemental analysis showing the distribution of Bi, Pt, and Ni elements.

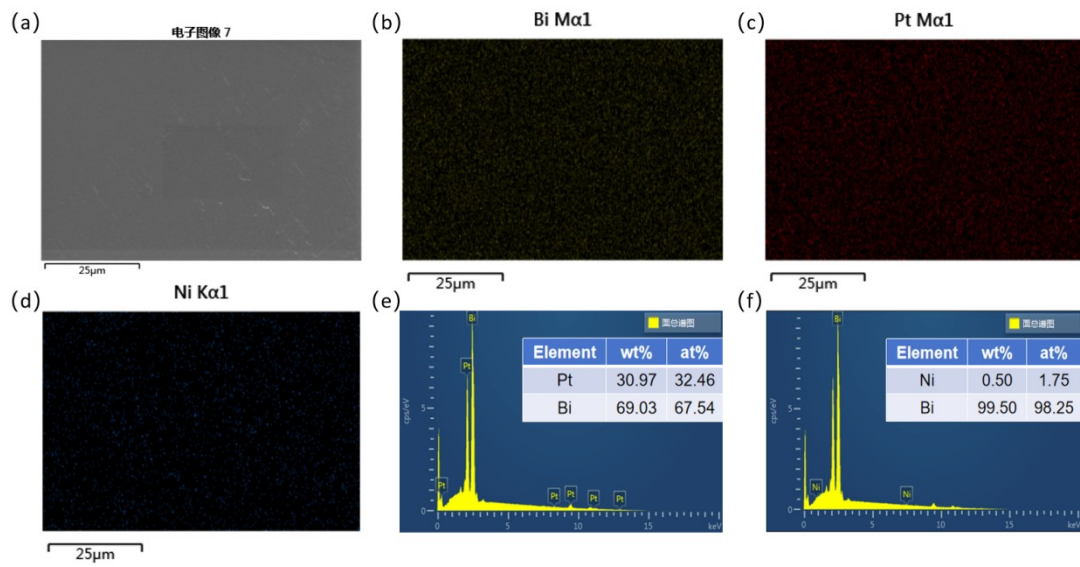

Fig. S5. SEM images of 1.19 at% Ni-PtBi<sub>2</sub>. EDX spectra of the Pt, Bi elements, and the quantification. EDX spectra of the Ni, Bi elements and the quantification. Elemental analysis showing the distribution of Bi, Pt, and Ni elements.

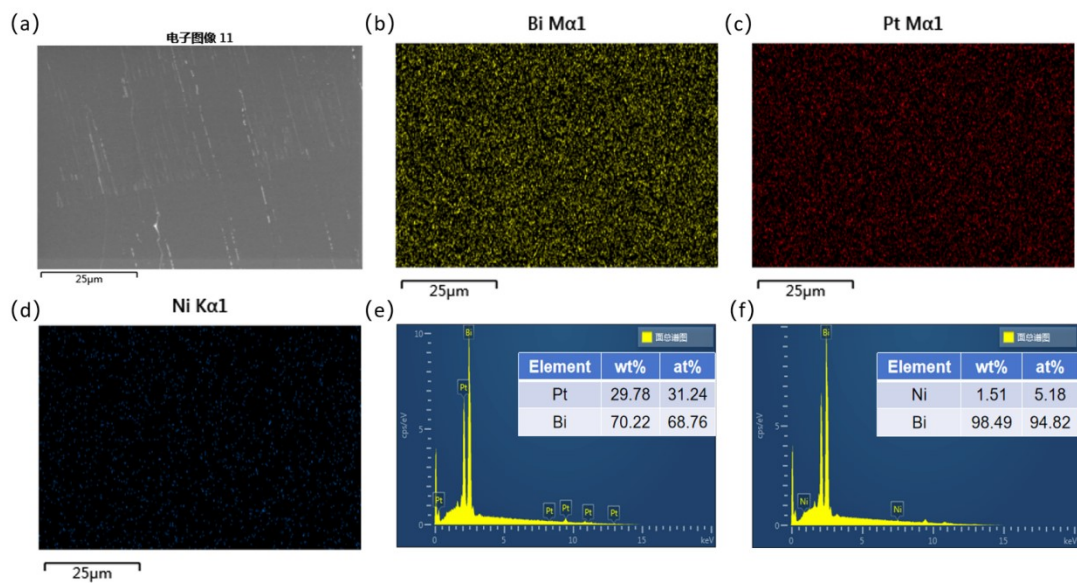

Fig. S6. SEM images of 3.62 at% Ni-PtBi<sub>2</sub>. EDX spectra of the Pt, Bi elements, and the quantification. EDX spectra of the Ni, Bi elements and the quantification. Elemental analysis showing the distribution of Bi, Pt, and Ni elements.

Table S1: EDS test atomic ratios and calculated Ni atom occupancies for Ni doped crystals.

| Label                         | Calculated Atomic Ratio | EDS Test Atomic Ratio | EDS Test Atomic Ratio |
|-------------------------------|-------------------------|-----------------------|-----------------------|
|                               | Ni : ( Ni+Pt+Bi )       | Pt : Bi               | Ni : Bi               |
| 0.65 at% Ni-PtBi <sub>2</sub> | 0.0065                  | 33.01 : 66.99         | 0.97 : 99.03          |
| 1.04 at% Ni-PtBi <sub>2</sub> | 0.0104                  | 32.33 : 67.67         | 1.53 : 98.47          |
| 1.19 at% Ni-PtBi <sub>2</sub> | 0.0119                  | 32.46 : 67.54         | 1.75 : 98.25          |
| 3.62 at% Ni-PtBi <sub>2</sub> | 0.0362                  | 31.24 : 68.76         | 5.18 : 94.82          |

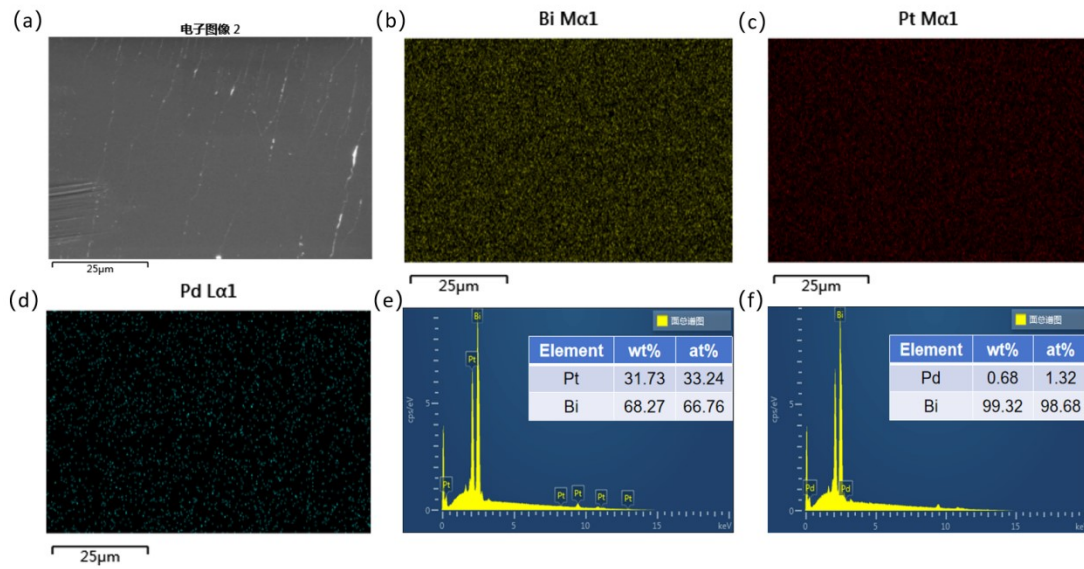

Fig. S7. SEM images of 0.89 at% Pd-PtBi<sub>2</sub>. EDX spectra of the Pt, Bi elements, and the quantification.EDX spectra of the Pd, Bi elements, and the quantification. Elemental analysis showing the distribution of Bi, Pt, and Pd elements.



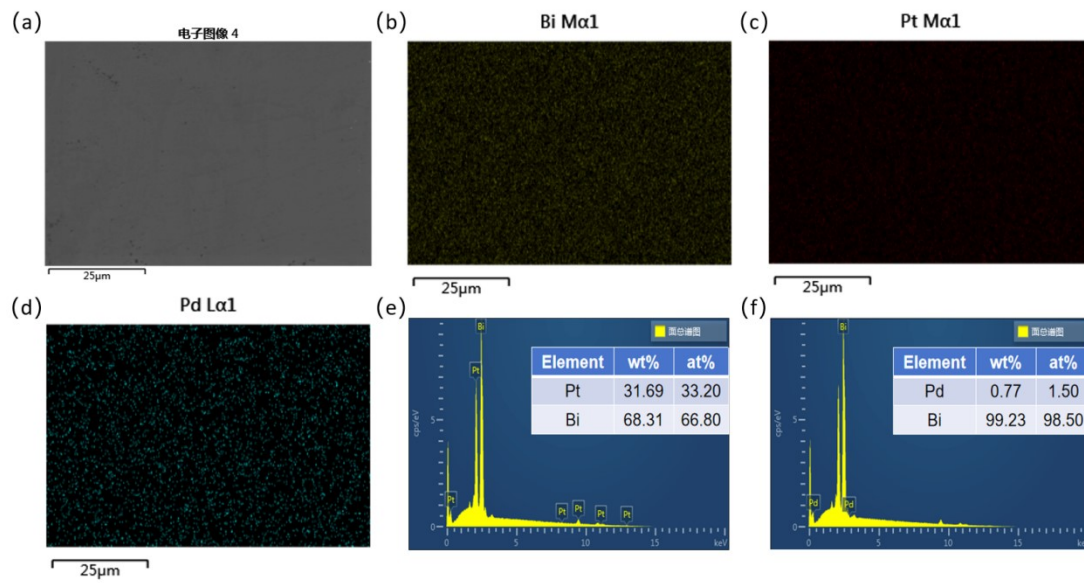

Fig. S8. SEM images of 1.01 at% Pd-PtBi<sub>2</sub>. EDX spectra of the Pt, Bi elements, and the quantification. EDX spectra of the Pd, Bi elements, and the quantification. Elemental analysis showing the distribution of Bi, Pt, and Pd elements.

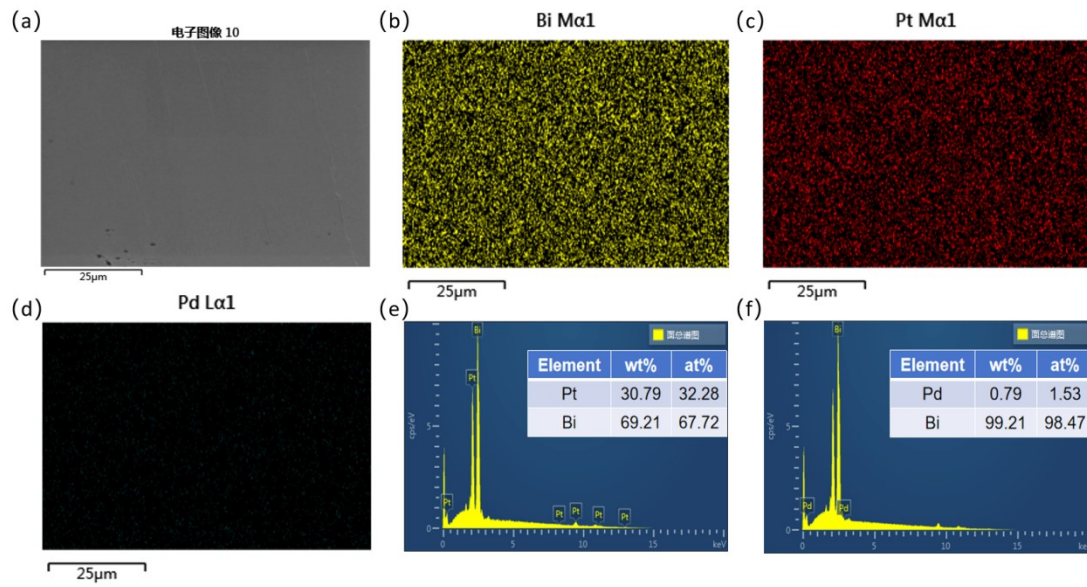

Fig. S9. SEM images of 1.04 at% Pd-PtBi<sub>2</sub>. EDX spectra of the Pt, Bi elements, and the quantification. EDX spectra of the Pd, Bi elements, and the quantification. Elemental analysis showing the distribution of Bi, Pt, and Pd elements.

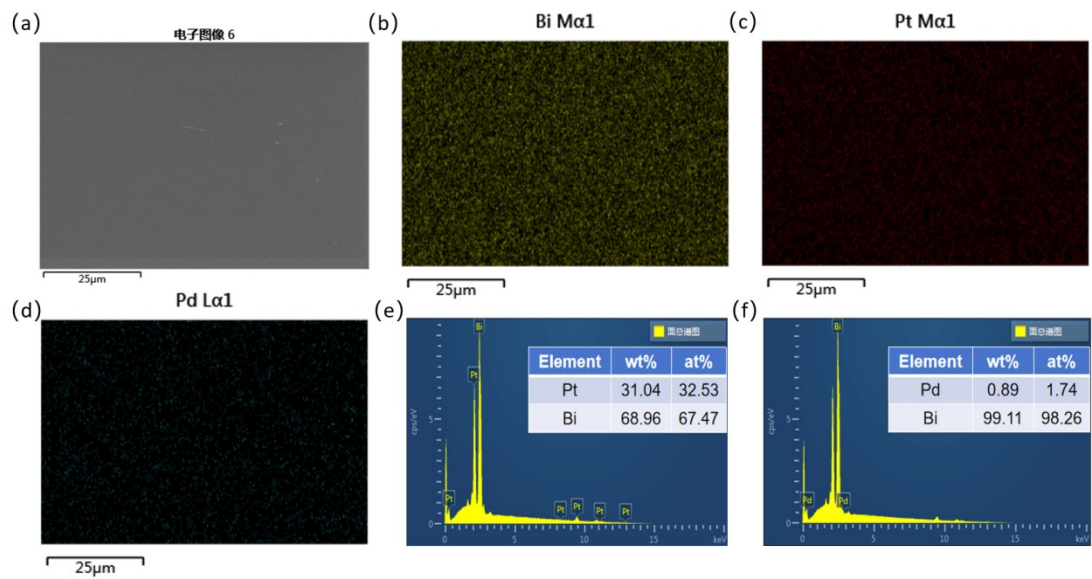

Fig. S10. SEM images of 1.18 at% Pd-PtBi<sub>2</sub>. EDX spectra of the Pt, Bi elements, and the quantification. EDX spectra of the Pd, Bi elements, and the quantification. Elemental analysis showing the distribution of Bi, Pt, and Pd elements.

Table S2: EDS test atomic ratios and calculated Pd atom occupancies for Pd doped crystals.

| Label                         | Calculated Atomic Ratio | EDS Test Atomic Ratio | EDS Test Atomic Ratio |
|-------------------------------|-------------------------|-----------------------|-----------------------|
|                               | Pd : ( Pd+Pt+Bi )       | Pt : Bi               | Pd : Bi               |
| 0.89 at% Pd-PtBi <sub>2</sub> | 0.0089                  | 33.24 : 66.76         | 1.32 : 98.68          |
| 1.01 at% Pd-PtBi <sub>2</sub> | 0.0101                  | 33.20 : 66.80         | 1.50 : 98.50          |
| 1.04 at% Pd-PtBi <sub>2</sub> | 0.0104                  | 32.28 : 67.72         | 1.53 : 98.47          |
| 1.18 at% Pd-PtBi <sub>2</sub> | 0.0118                  | 32.53 : 67.47         | 1.74 : 98.26          |

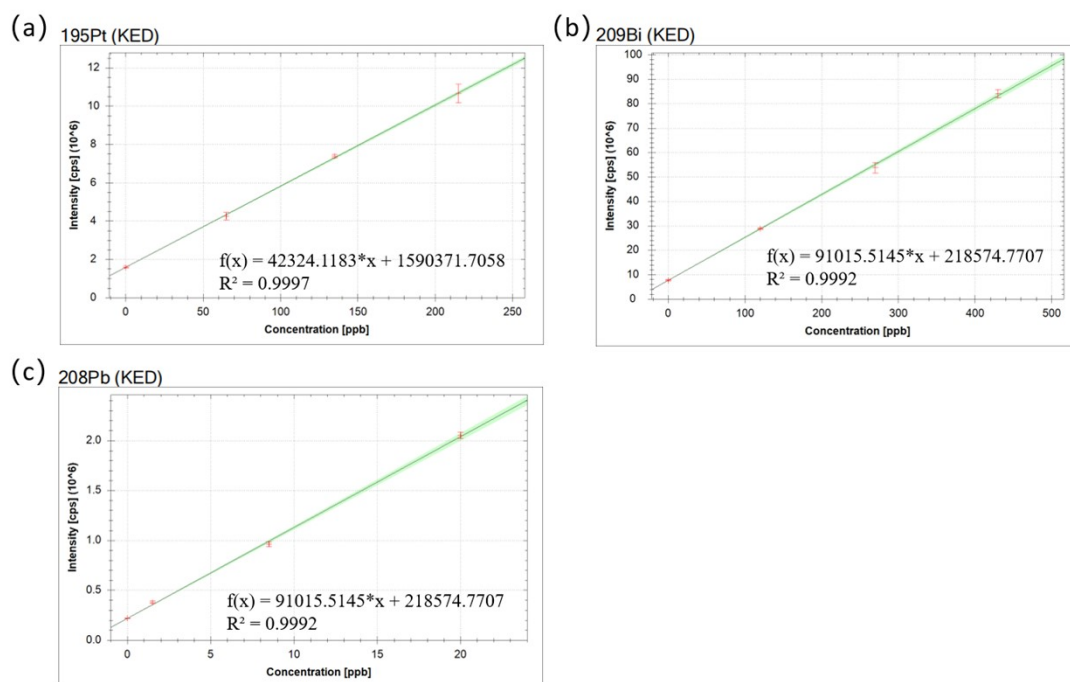

Fig. S11. The calibration curves of (a) Pt, (b) Bi, and (c) Pb elements with ICP-MS.

Table S3: The concentrations of Pt , Pb and Bi elements with ICP-MS.

| Label                         | 195Pt (KED) [ppb] | 208Pb (KED) [ppb] | 209Bi (KED) [ppb] |
|-------------------------------|-------------------|-------------------|-------------------|
| 0.28 at% Pb-PtBi <sub>2</sub> | 73.332            | 0.759             | 190.104           |
| 0.65 at% Pb-PtBi <sub>2</sub> | 49.099            | 1.289             | 146.197           |
| 0.88 at% Pb-PtBi <sub>2</sub> | 59.016            | 1.662             | 164.164           |
| 1.43 at% Pb-PtBi <sub>2</sub> | 71.378            | 3.783             | 186.079           |

The ICP-MS results provided weight ratios of the elements, which we then converted to atomic proportions of the doped Pb elements in the crystals.

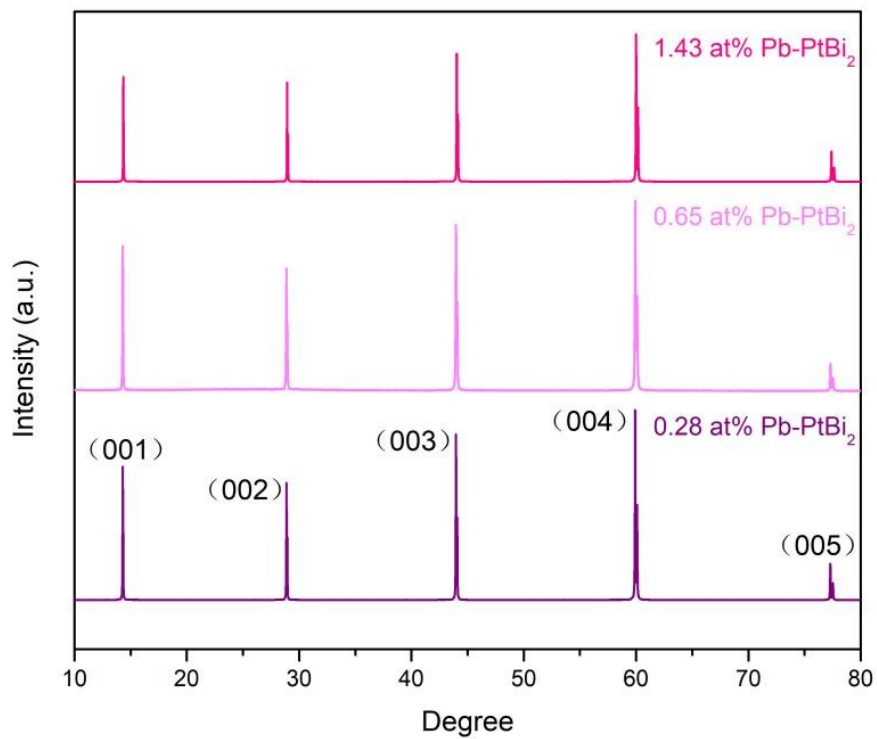

Fig. S12. XRD spectra of Pb  $\text{PtBi}_2$  with different Pb doping concentrations.

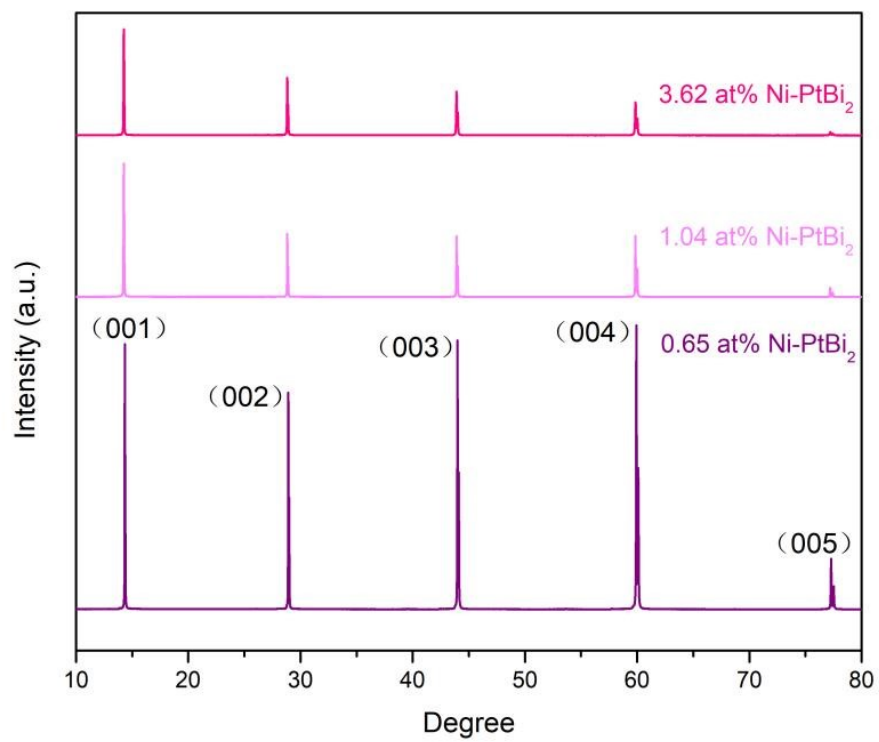

Fig. S13. XRD spectra of Ni-PtBi<sub>2</sub> with different Ni doping concentrations.

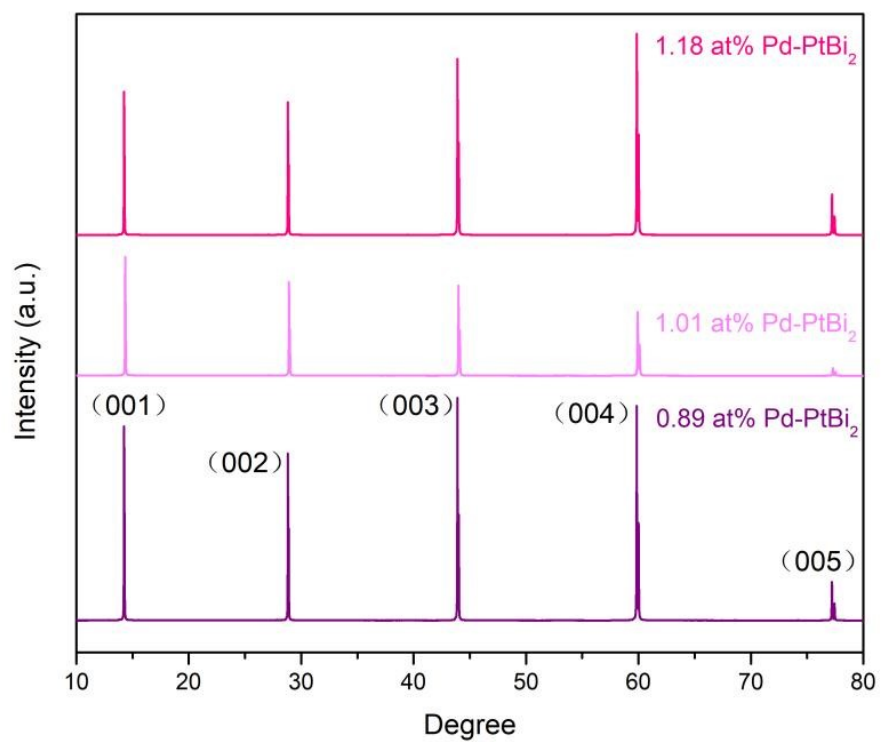

Fig. S14. XRD spectra of Pd-PtBi<sub>2</sub> with different Pd doping concentrations.



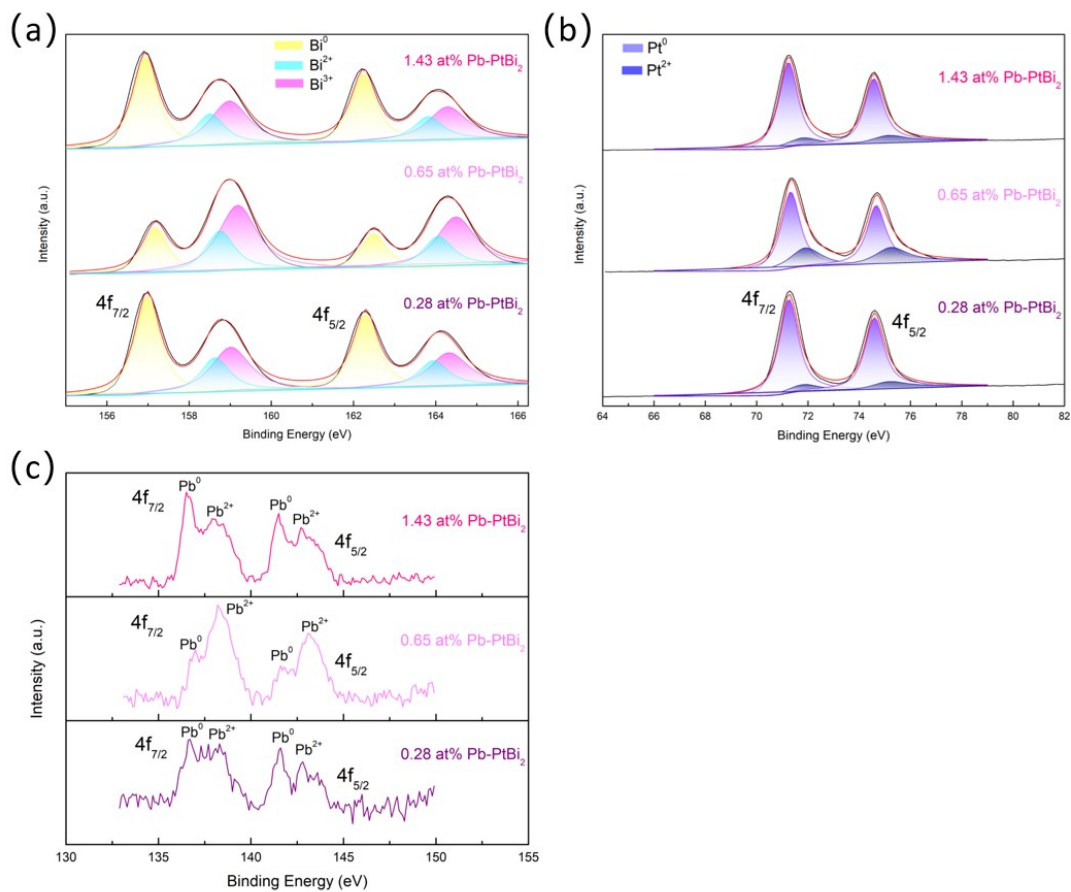

Fig. S15. XPS scanning (a) Bi 4f, (b) Pt 4f, (c) Pb 4f core levels were used to measure Pb-PtBi<sub>2</sub> with different Pb doping concentrations.

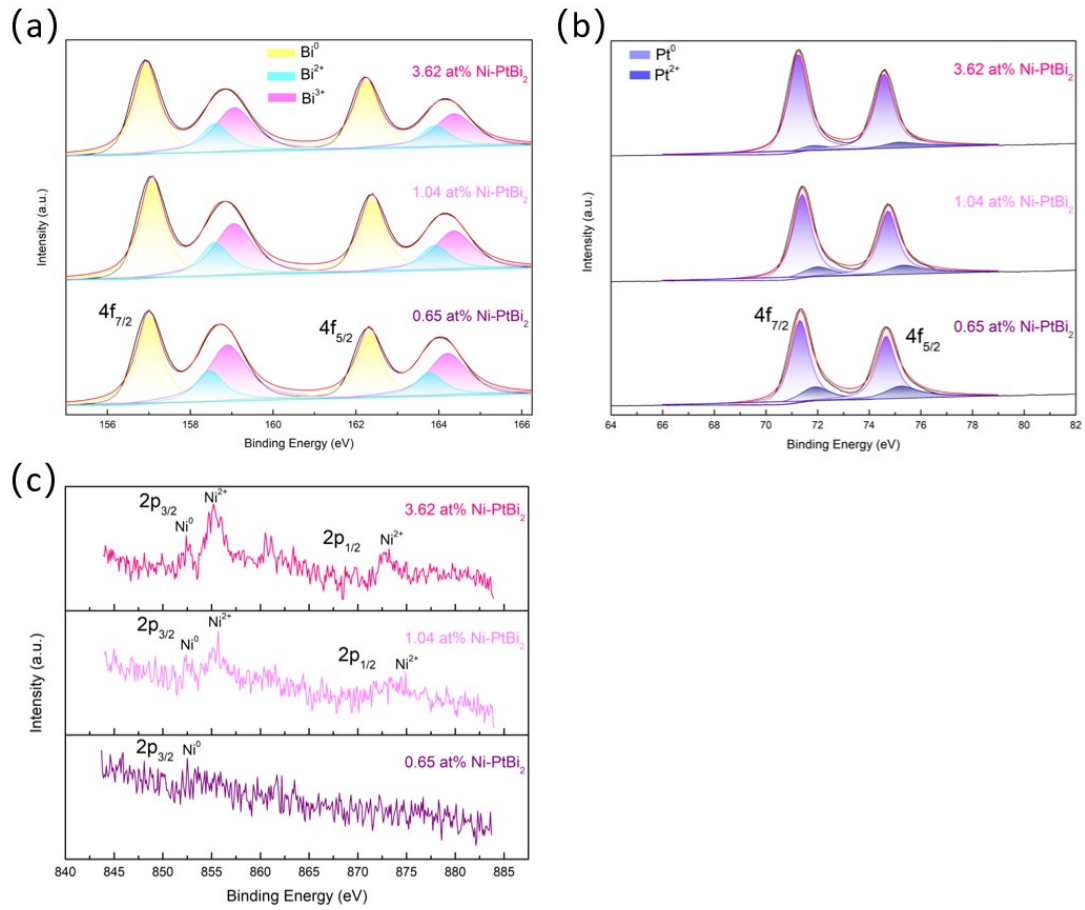

Fig. S16. XPS scanning (a) Bi 4*f*, (b) Pt 4*f*, and (c) Ni 2*p* core levels were used to measure Ni-PtBi<sub>2</sub> with different Ni doping concentrations.

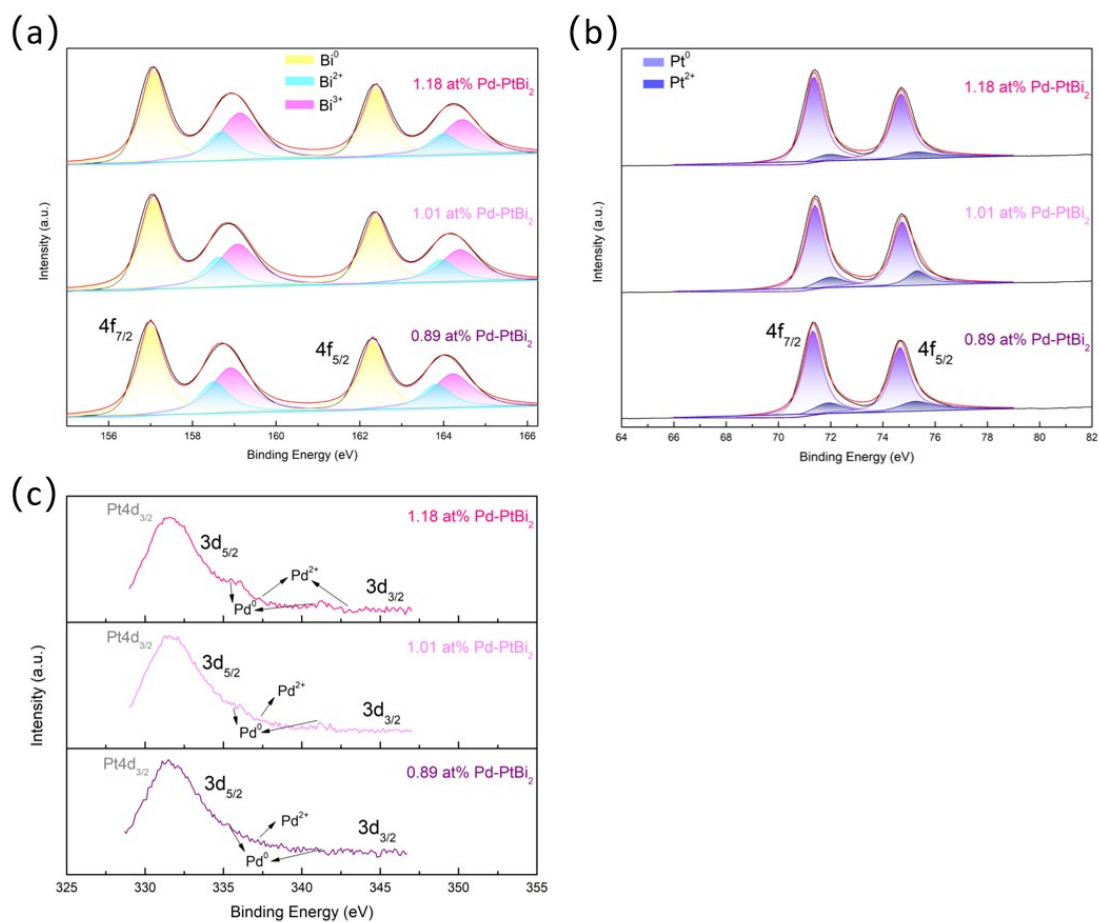

Fig. S17. XPS scanning (a) Bi 4f, (b) Pt 4f, and (c) Pd 3d core levels were used to measure Pd-PtBi<sub>2</sub> with different Pd doping concentrations.

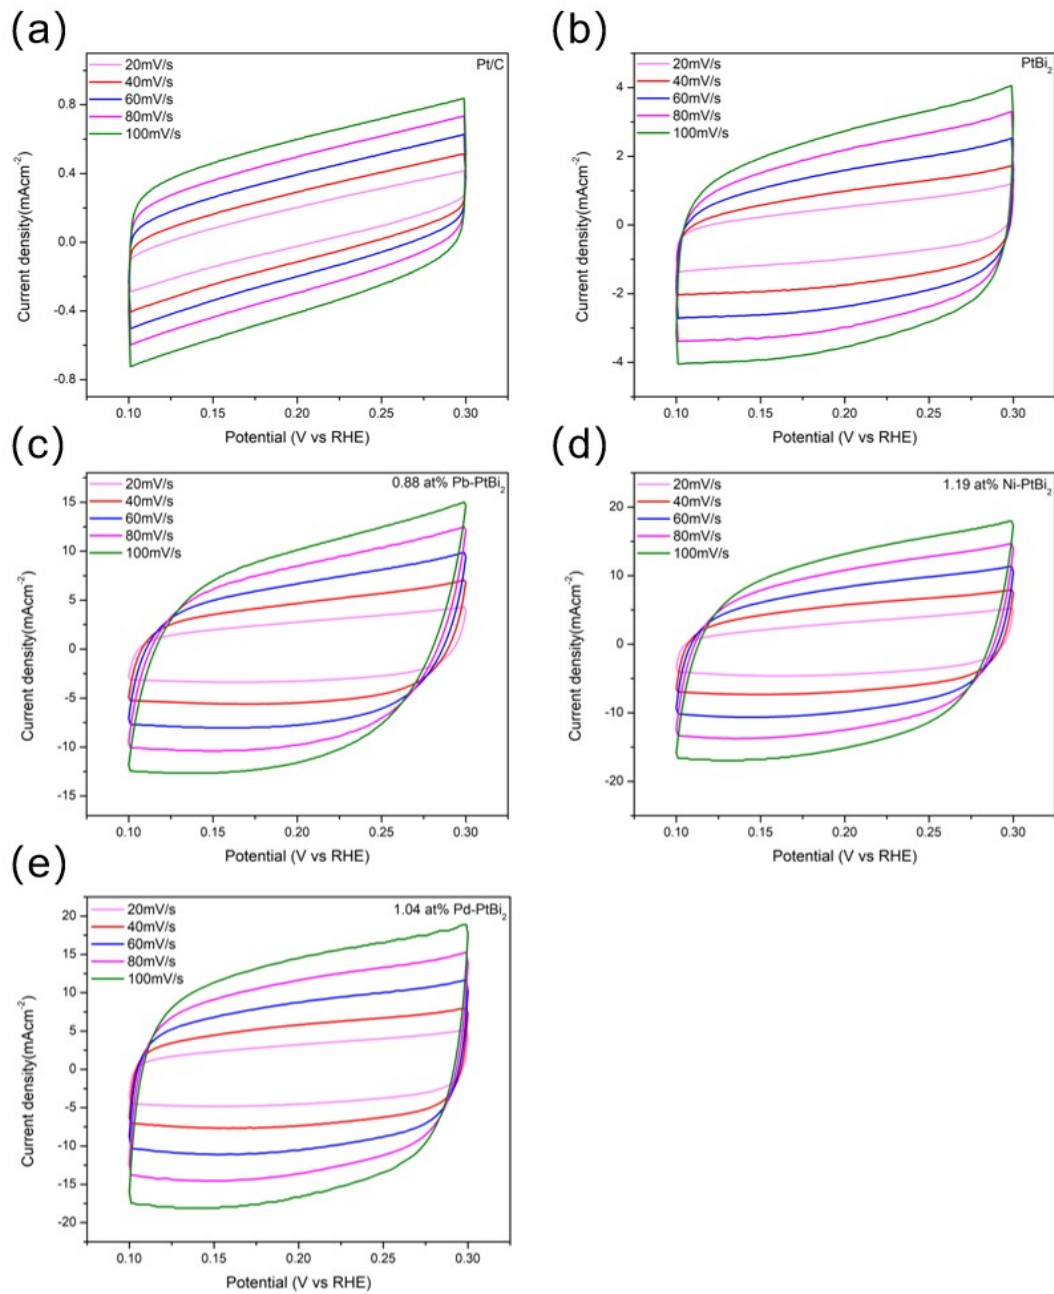

Fig. S18. Shows the cyclic voltammety curves of samples in 0.5 M H<sub>2</sub>SO<sub>4</sub> at different scan rates (20-100 mV/s) (a) Pt/C, (b) PtBi<sub>2</sub>, (c) 0.88 at% Pb-PtBi<sub>2</sub>, (d) 1.19 at% Ni-PtBi<sub>2</sub>, (e) 1.04 at% Pd-PtBi<sub>2</sub>.

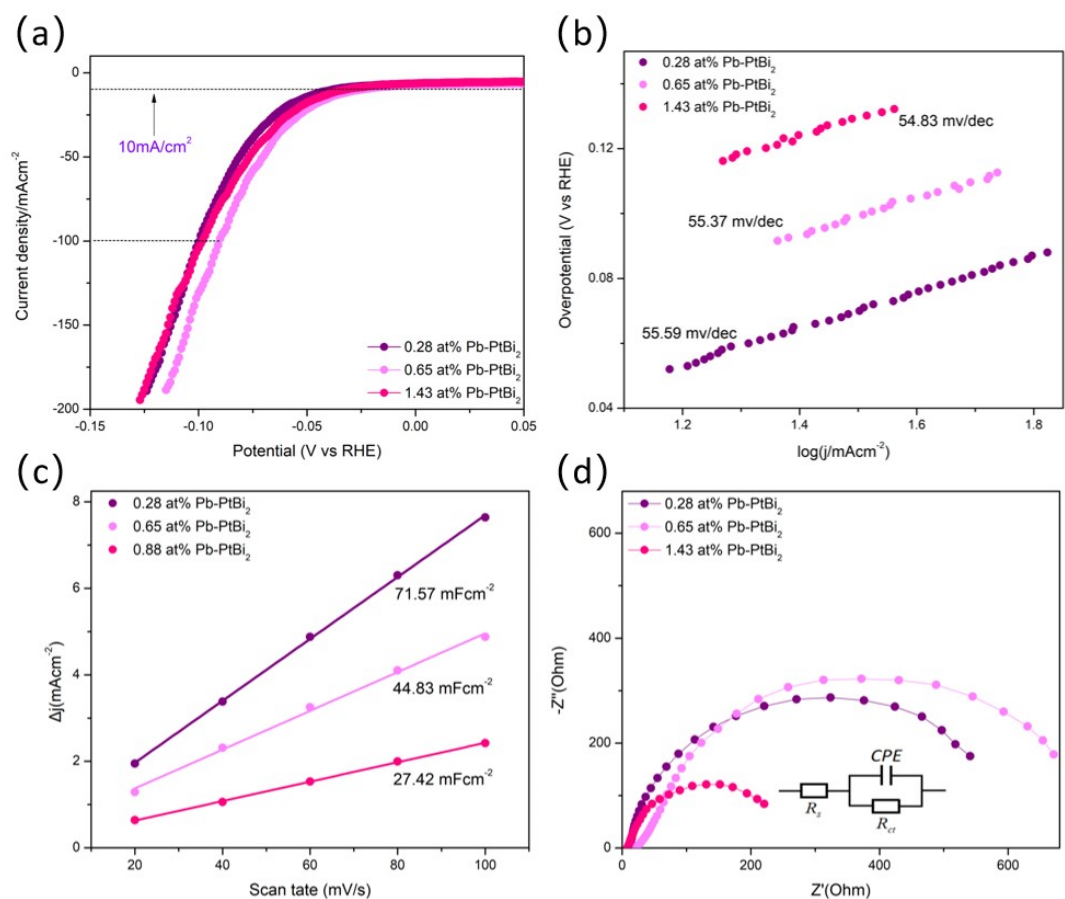

Fig. S19. (a) Linear sweep voltammetry (LSV) polarization curve. (b) Tafel slope. (c) The curve of current density with scanning rate. (d) Nyquist plot obtained from electrochemical impedance spectroscopy (EIS) measurement (illustration: simulated electrochemical equivalent circuit (EEC) of Nyquist plot).

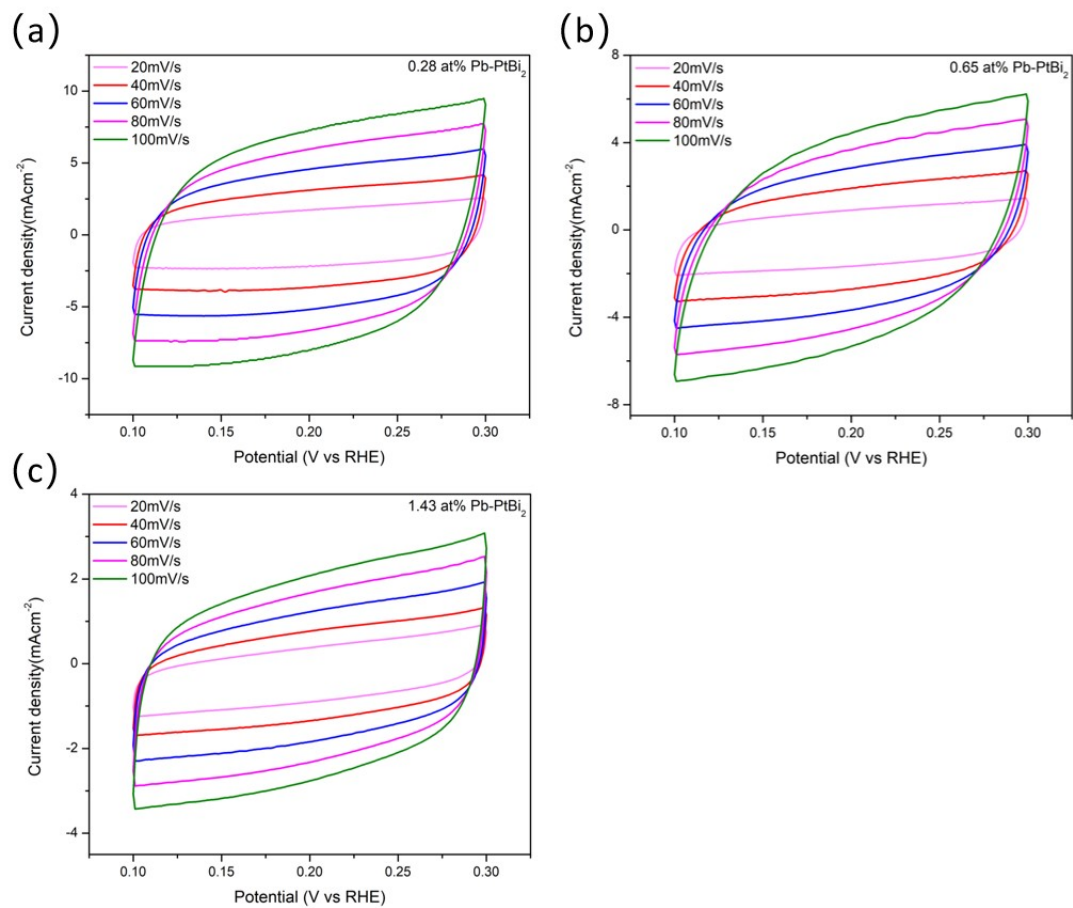

Fig. S20. Shows the cyclic voltammety curves of samples in 0.5 M H<sub>2</sub>SO<sub>4</sub> at different scan rates (20-100 mV/s): (a) 0.28 at% Pb-PtBi<sub>2</sub>, (b) 0.65 at% Pb-PtBi<sub>2</sub>, (c) 1.43 at% Pb-PtBi<sub>2</sub>.

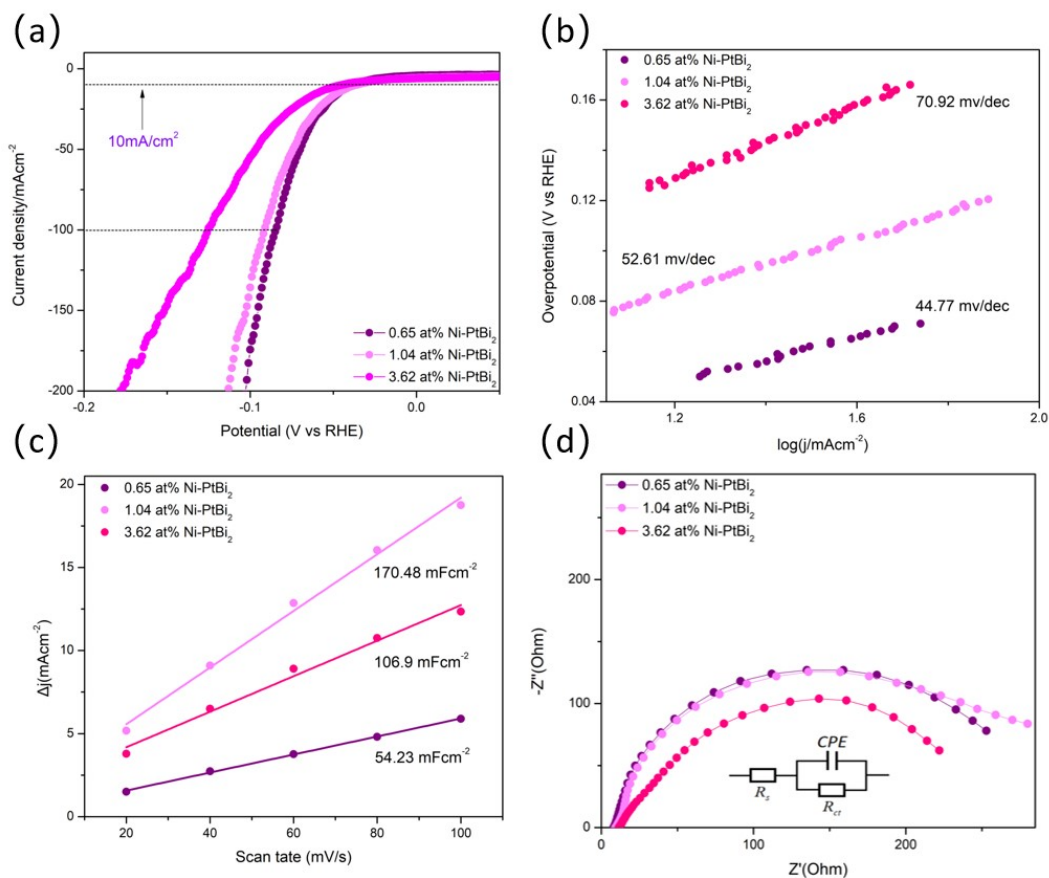

Fig. S21. (a) Linear sweep voltammetry (LSV) polarization curve. (b) Tafel slope. (c) The curve of current density with scanning rate. (d) Nyquist plot obtained from electrochemical impedance spectroscopy (EIS) measurement (illustration: simulated electrochemical equivalent circuit (EEC) of Nyquist plot).

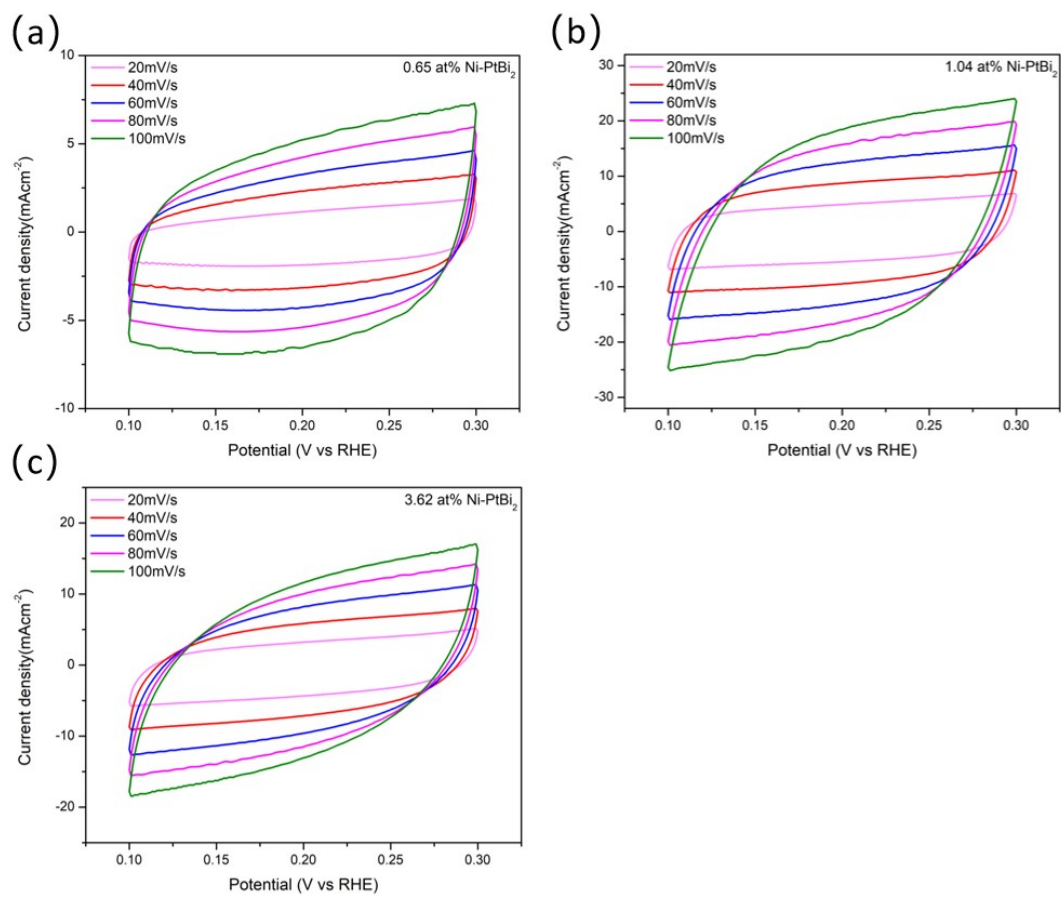

Fig. S22. Shows the cyclic voltammety curves of samples in 0.5 M H<sub>2</sub>SO<sub>4</sub> at different scan rates (20-100 mV/s): (a) 0.65 at% Ni-PtBi<sub>2</sub>, (b) 1.04 at% Ni-PtBi<sub>2</sub>, (c) 3.62 at% Ni-PtBi<sub>2</sub>.



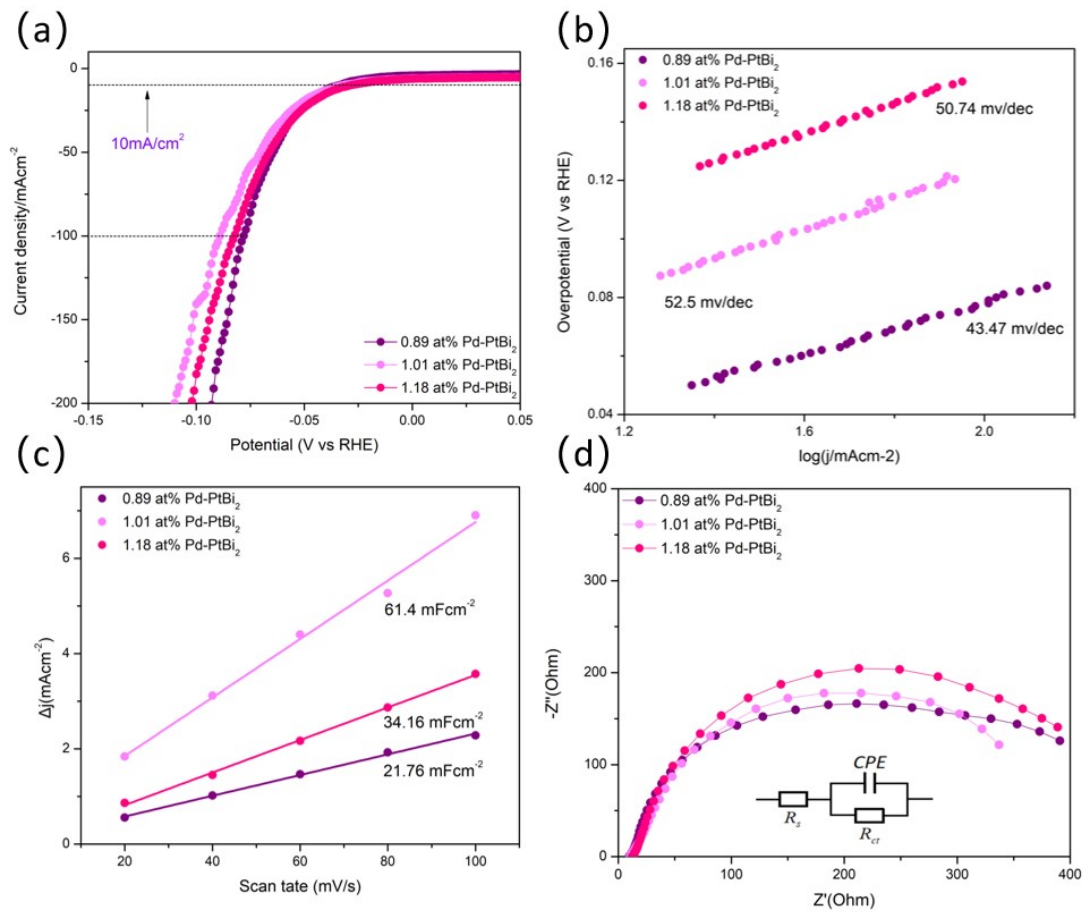

Fig. S23. (a) Linear sweep voltammetry (LSV) polarization curve. (b) Tafel slope. (c) The curve of current density with scanning rate. (d) Nyquist plot obtained from electrochemical impedance spectroscopy (EIS) measurement (illustration: simulated electrochemical equivalent circuit (EEC) of Nyquist plot).

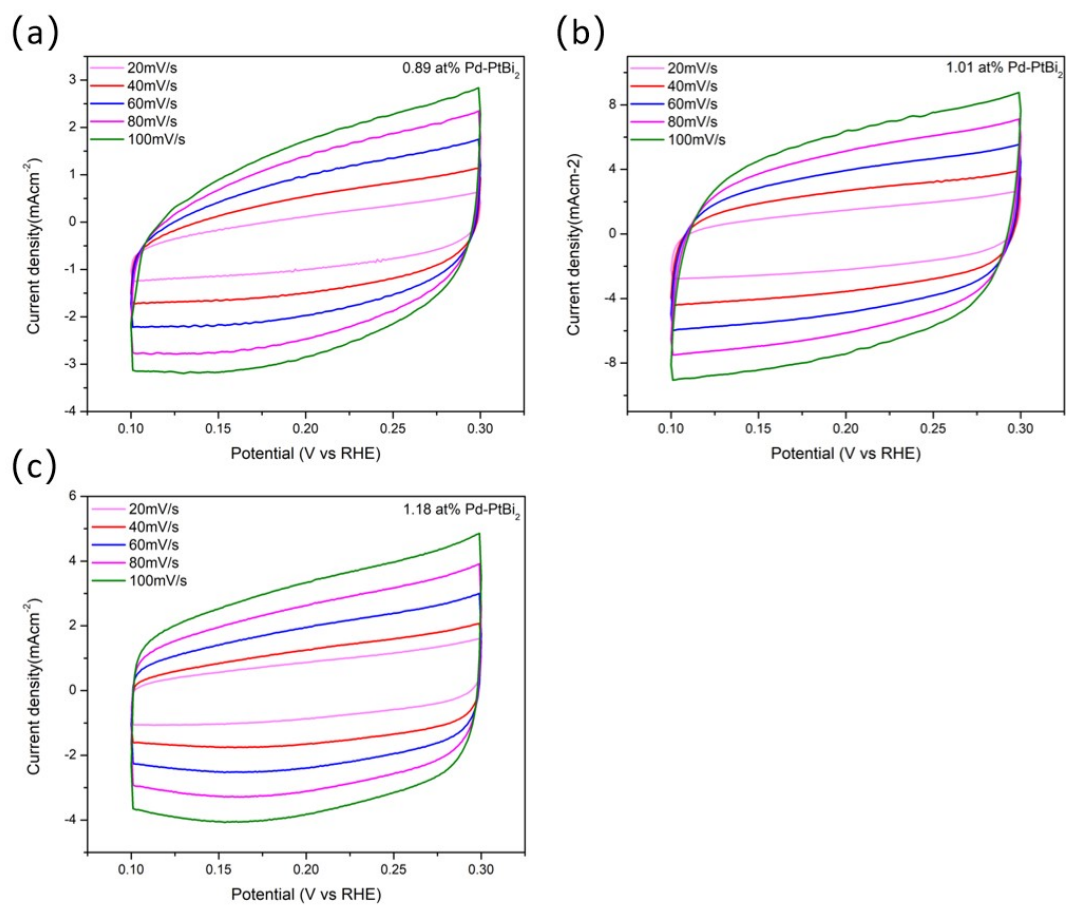

Fig. S24. Shows the cyclic voltammety curves of samples in 0.5 M H<sub>2</sub>SO<sub>4</sub> at different scan rates (20-100 mV/s): (a) 0.89 at% Pd-PtBi<sub>2</sub>, (b) 1.01 at% Pd-PtBi<sub>2</sub>, (c) 1.18 at% Pd-PtBi<sub>2</sub>.

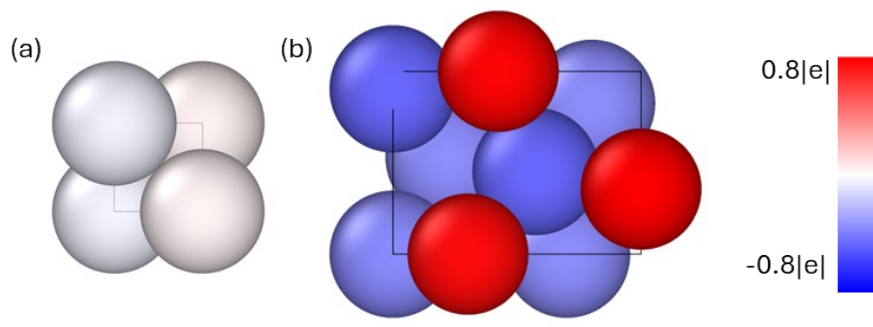

Figure S25. Charges on Pt and Bi in bulk structures with a top view. (a) Pt, (b) PtBi<sub>2</sub>.

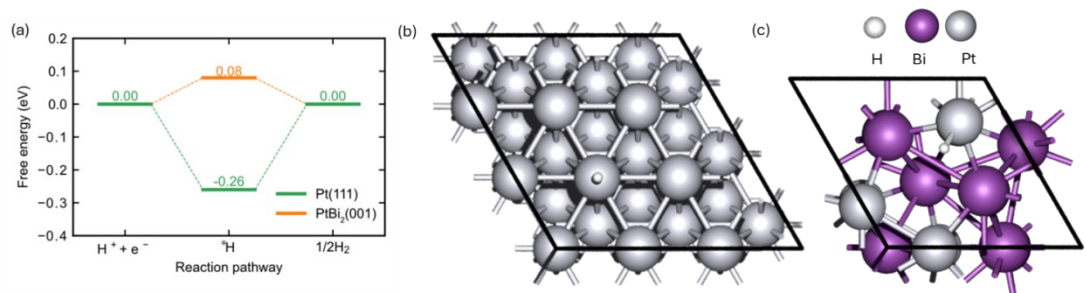

Figure S26. Hydrogen binding energetics and atomic configurations. (a) Calculated free energy surfaces for H adsorption on Pt(111) and PtBi<sub>2</sub>(001) surfaces. (b,c) Corresponding optimized atomic configurations of H-adsorbed structures.

Table S4. Calculated  $d$  band center(eV)

| surface              | $d$ band center(eV) |
|----------------------|---------------------|
| Pt                   | -2.66               |
| PtBi <sub>2</sub>    | -3.01               |
| Ni-PtBi <sub>2</sub> | -3.04               |
| Pb-PtBi <sub>2</sub> | -2.90               |
| Pd-PtBi <sub>2</sub> | -3.06               |

Table S5. The HER performance compared with other topological materials electrocatalysts in 0.5 M H<sub>2</sub>SO<sub>4</sub>.

| <b>Electrocatalyst</b>                                 | <b>Overpotential</b><br>(10 mV•cm <sup>-2</sup> ) | <b>Overpotential</b><br>(100 mV•cm <sup>-2</sup> ) | <b>Tafel slope</b><br>(mV•dec <sup>-1</sup> ) | <b>Stability</b><br>Time/CV<br>cycles | <b>Reference</b> |
|--------------------------------------------------------|---------------------------------------------------|----------------------------------------------------|-----------------------------------------------|---------------------------------------|------------------|
| <b>Pt/C</b>                                            | <b>38</b>                                         | <b>107</b>                                         | <b>60.8</b>                                   | <b>12h</b>                            | <b>This work</b> |
| <b>PtBi<sub>2</sub></b>                                | <b>40</b>                                         | <b>96</b>                                          | <b>53.6</b>                                   | <b>240h</b>                           | <b>This work</b> |
| <b>0.88 at% Pb-PtBi<sub>2</sub></b>                    | <b>39</b>                                         | <b>87</b>                                          | <b>44.7</b>                                   | <b>240h</b>                           | <b>This work</b> |
| <b>1.19 at% Ni-PtBi<sub>2</sub></b>                    | <b>37</b>                                         | <b>83</b>                                          | <b>44.1</b>                                   | <b>240h</b>                           | <b>This work</b> |
| <b>1.04 at% Pd-PtBi<sub>2</sub></b>                    | <b>33</b>                                         | <b>80</b>                                          | <b>43.8</b>                                   | <b>240h</b>                           | <b>This work</b> |
| Pt/C                                                   | 23                                                | ~155                                               | 35                                            | 24h                                   | 1                |
| PtTe <sub>2</sub>                                      | 109                                               | ~260                                               | 140                                           | 24h                                   | 1                |
| P-PtTe <sub>2</sub>                                    | 57                                                | ~240                                               | 88                                            | 24h                                   | 1                |
| A/C-P-PtTe <sub>2</sub>                                | 28                                                | ~148                                               | 37                                            | 24h                                   | 1                |
| Ru <sub>3</sub> Sn <sub>7</sub>                        | 28                                                | -                                                  | 22                                            | 50h                                   | 2                |
| 1T'-MoS <sub>2</sub> /CeO <sub>2</sub> /rGO            | 140                                               | -                                                  | 43                                            | 10000cycles                           | 3                |
| 1T'-D/2H WS <sub>2</sub>                               | 170                                               | -                                                  | 40                                            | 10000cycles                           | 4                |
| MoS <sub>2</sub> /Bi <sub>2</sub> Te <sub>3</sub> /STO | 248                                               | -                                                  | 58                                            | 20h                                   | 5                |
| MoS <sub>2</sub> /Bi <sub>2</sub> Te <sub>3</sub> /NF  | 160                                               | -                                                  | 66                                            | 20h                                   | 5                |
| 1T'-WTe <sub>2</sub> nanoribbon                        | 430                                               | -                                                  | 57                                            | 20h                                   | 6                |
| Defective WTe <sub>2</sub><br>nanosheet                | 251                                               | -                                                  | 94                                            | 26h                                   | 7                |

Table S6. The HER performance compared with other Pt-based electrocatalysts in 0.5 M H<sub>2</sub>SO<sub>4</sub>.

| Electrocatalyst                     | Overpotential<br>(10 mV•cm <sup>-2</sup> ) | Overpotential<br>(100 mV•cm <sup>-2</sup> ) | Tafel<br>slope<br>(mV•dec <sup>-1</sup> ) | Stability<br>Time/CV<br>cycles | Reference        |
|-------------------------------------|--------------------------------------------|---------------------------------------------|-------------------------------------------|--------------------------------|------------------|
| <b>Pt/C</b>                         | <b>38</b>                                  | <b>107</b>                                  | <b>60.8</b>                               | <b>12h</b>                     | <b>This work</b> |
| <b>PtBi<sub>2</sub></b>             | <b>40</b>                                  | <b>96</b>                                   | <b>53.6</b>                               | <b>240h</b>                    | <b>This work</b> |
| <b>0.88 at% Pb-PtBi<sub>2</sub></b> | <b>39</b>                                  | <b>87</b>                                   | <b>44.7</b>                               | <b>240h</b>                    | <b>This work</b> |
| <b>1.19 at% Ni-PtBi<sub>2</sub></b> | <b>37</b>                                  | <b>83</b>                                   | <b>44.1</b>                               | <b>240h</b>                    | <b>This work</b> |
| <b>1.04 at% Pd-PtBi<sub>2</sub></b> | <b>33</b>                                  | <b>80</b>                                   | <b>43.8</b>                               | <b>240h</b>                    | <b>This work</b> |
| Pt/GNs                              | 25                                         | ~48                                         | 33                                        | 1000cycles                     | 8                |
| Pt-CNTs                             | 41                                         | ~210                                        | 48                                        | 500s                           | 9                |
| Pt <sub>50</sub> -PG                | 44                                         | 134                                         | 63                                        | 6h                             | 10               |
| Pt/f-MWCNTs                         | 43                                         | ~90                                         | 30                                        | 10h                            | 11               |
| Pt-Au-Si nanowires                  | 50                                         | ~150                                        | 24                                        | 10h                            | 12               |
| Pt <sub>0.04</sub> /Ni-DA           | 19                                         | -                                           | 34                                        | 6000cycles                     | 13               |
| Pt@TiO <sub>2</sub>                 | 39                                         | -                                           | 42                                        | 120h                           | 14               |
| Pt/def-WO <sub>3</sub> @CFC         | 42                                         | -                                           | 73                                        | 70000s                         | 15               |
| Pt/GC                               | 56                                         | -                                           | 30                                        | 3h                             | 16               |
| Pt@PCM                              | 105                                        | -                                           | 65.3                                      | 5h                             | 17               |

1. H. Ma, X. Huang, L. Li, W. Peng, S. Lin, Y. Ding and L. Mai, Boosting the Hydrogen Evolution Reaction Performance of P-Doped PtTe<sub>2</sub> Nanocages via Spontaneous Defects Formation, *Small*, 2023, **19**.
2. X. Zhang, L. Wang, M. Li, W. Meng, Y. Liu, X. Dai, G. Liu, Y. Gu, J. Liu and L. Kou, Topological surface state: Universal catalytic descriptor in topological catalysis, *Materials Today*, 2023, **67**, 23-32.
3. K. Nie, X. Qu, D. Gao, B. Li, Y. Yuan, Q. Liu, X. Li, S. Chong and Z. Liu, Engineering Phase Stability of Semimetallic MoS<sub>2</sub> Monolayers for Sustainable Electrocatalytic Hydrogen Production, *ACS Applied Materials & Interfaces*, 2022, **14**, 19847-19856.
4. L. Wang, G. Zhou, H. Luo, Q. Zhang, J. Wang, C. Zhao, A. M. Rao, B. Xu and B. Lu, Enhancing catalytic activity of tungsten disulfide through topology, *Applied Catalysis B: Environmental*, 2019, **256**.
5. G. Li, J. Huang, Q. Yang, L. Zhang, Q. Mu, Y. Sun, S. Parkin, K. Chang and C. Felser, MoS<sub>2</sub> on topological insulator Bi<sub>2</sub>Te<sub>3</sub> thin films: Activation of the basal plane for hydrogen reduction, *Journal of Energy Chemistry*, 2021, **62**, 516-522.
6. J. Li, M. Hong, L. Sun, W. Zhang, H. Shu and H. Chang, Enhanced Electrocatalytic Hydrogen Evolution from Large-Scale, Facile-Prepared, Highly Crystalline WTe<sub>2</sub> Nanoribbons with Weyl Semimetallic Phase, *ACS Applied Materials & Interfaces*, 2017, **10**, 458-467.
7. X. Wang, J. Wang, B. Wei, N. Zhang, J. Xu, H. Miao, L. Liu, C. Su, Y. Li and Z. Wang, Plasma tailoring in WTe<sub>2</sub> nanosheets for efficiently boosting hydrogen evolution reaction, *Journal of Materials Science & Technology*, 2021, **78**, 170-175.
8. X. Yan, H. Li, J. Sun, P. Liu, H. Zhang, B. Xu and J. Guo, Pt nanoparticles decorated high-defective graphene nanospheres as highly efficient catalysts for the hydrogen evolution reaction, *Carbon*, 2018, **137**, 405-410.
9. W. Zhong, W. Tu, Z. Wang, Z. Lin, A. Xu, X. Ye, D. Chen and B. Xiao, Ultralow-temperature assisted synthesis of single platinum atoms anchored on carbon nanotubes for efficiently electrocatalytic acidic hydrogen evolution, *Journal of Energy Chemistry*, 2020, **51**, 280-284.
10. L.-C. Balint, I. Hulka and A. Kellenberger, Pencil Graphite Electrodes Decorated with Platinum Nanoparticles as Efficient Electrocatalysts for Hydrogen Evolution Reaction, *Materials*, 2021, **15**.
11. J. Ji, Y. Zhang, L. Tang, C. Liu, X. Gao, M. Sun, J. Zheng, M. Ling, C. Liang and Z. Lin, Platinum single-atom and cluster anchored on functionalized MWCNTs with ultrahigh mass efficiency for electrocatalytic hydrogen evolution, *Nano Energy*, 2019, **63**.
12. B. Jiang, Z. Tang, F. Liao, H. Lin, S. Lu, Y. Li and M. Shao, Powerful synergy: efficient Pt–Au–Si nanocomposites as state-of-the-art catalysts for electrochemical hydrogen evolution, *J. Mater. Chem. A*, 2017, **5**, 21903-21908.
13. Y. Peng, K. Ma, T. Xie, J. Du, L. Zheng, F. Zhang, X. Fan, W. Peng, J. Ji and Y. Li, Tunable Pt–Ni Interaction Induced Construction of Disparate Atomically Dispersed Pt Sites for Acidic Hydrogen Evolution, *ACS Applied Materials & Interfaces*, 2023, **15**, 27089-27098.
14. S. Cho, G. Yim, J. Koh, H. Jang and J. T. Park, One-pot synthesis of Pt@TiO<sub>2</sub> core-shell nanoparticles for stable hydrogen evolution reaction in acidic and alkaline media, *Materials Today Chemistry*, 2023, **32**.

15. H. Tian, X. Cui, L. Zeng, L. Su, Y. Song and J. Shi, Oxygen vacancy-assisted hydrogen evolution reaction of the Pt/WO<sub>3</sub> electrocatalyst, *Journal of Materials Chemistry A*, 2019, **7**, 6285-6293.
16. L. Rakočević, J. Golubović, D. Vasiljević Radović, V. Rajić and S. Štrbac, A comparative study of hydrogen evolution on Pt/GC and Pt/GNPs in acid solution, *International Journal of Hydrogen Energy*, 2024, **51**, 1240-1254.
17. H. Zhang, P. An, W. Zhou, B. Y. Guan, P. Zhang, J. Dong and X. W. Lou, Dynamic traction of lattice-confined platinum atoms into mesoporous carbon matrix for hydrogen evolution reaction, *Science Advances*, **4**, eaao6657.
